# Supplementary material for: Gold nanoparticles supported on Ce–Zr oxides for the oxidative esterification of aldehydes to esters
Source: Royal Society of Chemistry journal article supplement (doi:10.1039/c5cy00241a), 2015-01-01
Supplement: c5cy00241a1.pdf [file c5cy00241a1.pdf]

## Electronic supplementary information

### **Gold nanoparticles supported on Ce-Zr oxides for the oxidative esterification of aldehydes to esters**

**Yuchao Li,<sup>a,b</sup> Lei Wang,<sup>a</sup> Ruiyi Yan,<sup>a</sup> Junxing Han<sup>a</sup> and Suojiang Zhang<sup>\*a</sup>**

<sup>a</sup> Beijing Key Laboratory of Ionic Liquids Clean Process, State Key Laboratory of Multiphase Complex System, Institute of Process Engineering, Chinese Academy of Sciences, Beijing 100190, China

E-mail: sjzhang@ipe.ac.cn

<sup>b</sup> College of Chemical and Engineering, University of Chinese Academy of Sciences, Beijing 100049, China

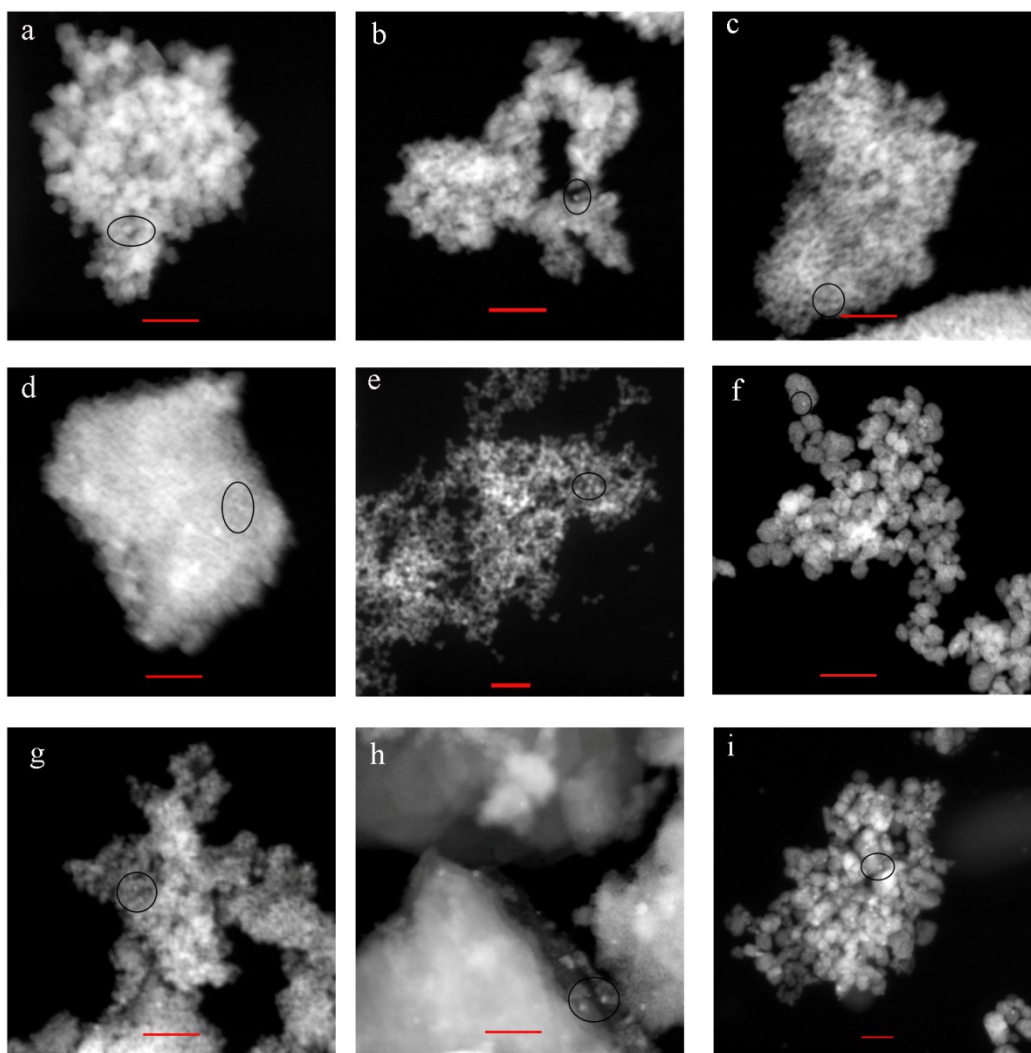

Fig. S1 HAADF-STEM images of Au catalyst. (a) Au/A-CeO<sub>2</sub>; (b) Au/A-Ce<sub>0.8</sub>Zr<sub>0.2</sub>O<sub>2</sub>; (c) Au/A-Ce<sub>0.6</sub>Zr<sub>0.4</sub>O<sub>2</sub>; (d) Au/A-Ce<sub>0.4</sub>Zr<sub>0.6</sub>O<sub>2</sub>; (e) Au/A-Ce<sub>0.2</sub>Zr<sub>0.8</sub>O<sub>2</sub>; (f) Au/ZrO<sub>2</sub>; (g) Au/B-Ce<sub>0.8</sub>Zr<sub>0.2</sub>O<sub>2</sub>; (h) Au/B-Ce<sub>0.4</sub>Zr<sub>0.6</sub>O<sub>2</sub>; (i) Au/B-Ce<sub>0.2</sub>Zr<sub>0.8</sub>O<sub>2</sub>. The representative Au particle was indicated by the black circle. The scale bar is 20 nm. All the catalysts presented similar Au particles around 3 nm.
